# Supplementary material
Source: PubMed Central journal article supplement (PMC6953904)
Supplement: NIHMS1066595-supplement-Supplemental.pdf [file NIHMS1066595-supplement-Supplemental.pdf]

## Supplementary file

### Alterations in immune and renal biomarkers among workers occupationally exposed to low levels of trichloroethylene below current regulatory standards

Kyoung-Mu Lee<sup>1,2\*</sup>, Luoping Zhang<sup>3\*</sup>, Roel C. Vermeulen<sup>4\*</sup>, Wei Hu<sup>1\*</sup>, Bryan A. Bassig<sup>1</sup>, Jason Y.Y. Wong<sup>1</sup>, Chuangyi Qiu<sup>5</sup>, Mark P. Purdue<sup>1</sup>, Cuiju Wen<sup>5</sup>, Douglas I. Walker<sup>6</sup>, Dean P. Jones<sup>6</sup>, Laiyu Li<sup>7</sup>, Yongshun Huang<sup>5</sup>, Nathaniel Rothman<sup>1±</sup>, Martyn T. Smith<sup>3±</sup>, Qing Lan<sup>1±</sup>

<sup>1</sup>Division of Cancer Epidemiology and Genetics, National Cancer Institute, Bethesda, MD; <sup>2</sup>Department of Environmental Health, Korea National Open University, Seoul, Korea; <sup>3</sup>Division of Environmental Health Sciences, School of Public Health, University of California, Berkeley, CA; <sup>4</sup>Division of Environmental Epidemiology, Institute for Risk Assessment Services, Utrecht University, Utrecht, the Netherlands; <sup>5</sup>Guangdong Poison Control Center, Guangzhou, Guangdong, China; <sup>6</sup>Department of Environmental Medicine and Public Health, Icahn School of Medicine at Mount Sinai, New York, NY; <sup>7</sup>Guangdong Medical Laboratory Animal Center, Foshan City, Guangdong, China

\* These authors contributed equally to this work.; ± These authors co-supervised this work.

Running title: Low levels of exposure to trichloroethylene and biologic alterations among workers

Key words: trichloroethylene, occupational exposure, biomarker, immune function,  
kidney toxicity

Correspondence to: Kyoung-Mu Lee, MPH, PhD

Occupational and Environmental Epidemiology Branch,

Division of Cancer Epidemiology and Genetics

National Cancer Institute, NIH

Phone: 240-276-7294; E-mail: kmlee92@knou.ac.kr

**Supplementary Table 1. Comparison between controls and the group exposed to less than 6 ppm for the levels of selected markers**

| Variable                        | Controls<br>(n=96)                  |                                    |              |                   | TCE-exposed group<br>(<6 ppm)<br>(n=23) |              |               | TCE-exposed group<br>(<4 ppm)<br>(n=18) |              |               | TCE-exposed group<br>(<3 ppm)<br>(n=12) |              |               | TCE-exposed group<br>(<2 ppm)<br>(n=9) |              |             | TCE-exposed group<br>(<1 ppm)<br>(n=4) |  |  |
|---------------------------------|-------------------------------------|------------------------------------|--------------|-------------------|-----------------------------------------|--------------|---------------|-----------------------------------------|--------------|---------------|-----------------------------------------|--------------|---------------|----------------------------------------|--------------|-------------|----------------------------------------|--|--|
|                                 | Mean<br>(SD)                        | Mean<br>(SD)                       | %<br>diff    | P                 | Mean<br>(SD)                            | %<br>diff    | P             | Mean<br>(SD)                            | %<br>diff    | P             | Mean<br>(SD)                            | %<br>diff    | P             | Mean<br>(SD)                           | %<br>diff    | P           |                                        |  |  |
| <b>Immune regulation</b>        |                                     |                                    |              |                   |                                         |              |               |                                         |              |               |                                         |              |               |                                        |              |             |                                        |  |  |
| CD4+ effect memory <sup>a</sup> | 224852<br>(92895)                   | 175047<br>(58296)                  | -22.1        | 0.10              | 178574<br>(61202)                       | -20.6        | 0.18          | 170250<br>(75409)                       | -24.3        | 0.23          | 170250<br>(75409)                       | -24.3        | 0.23          | 209834<br>(70812)                      | -6.7         | 0.71        |                                        |  |  |
| sCD27 <sup>b</sup>              | <b>148.8</b><br><b>(107.5)</b>      | <b>59.2</b><br><b>(22.1)</b>       | <b>-60.2</b> | <b>&lt;0.0001</b> | <b>61.7</b><br><b>(24.2)</b>            | <b>-58.6</b> | <b>0.0003</b> | <b>55.3</b><br><b>(11.3)</b>            | <b>-62.8</b> | <b>0.0006</b> | <b>53.9</b><br><b>(12.8)</b>            | <b>-63.8</b> | <b>0.0007</b> | <b>51.6</b><br><b>(14.6)</b>           | <b>-65.3</b> | <b>0.01</b> |                                        |  |  |
| sCD30 <sup>b</sup>              | 28.7<br>(18.8)                      | 20.2<br>(8.7)                      | -29.7        | 0.08              | 21.0<br>(9.6)                           | -26.6        | 0.22          | 21.1<br>(11.2)                          | -26.3        | 0.27          | 23.2<br>(12.3)                          | -19.1        | 0.54          | 24.5<br>(16.3)                         | -14.7        | 0.67        |                                        |  |  |
| IL10 <sup>c</sup>               | 13.8<br>(23.0)                      | 4.2<br>(4.7)                       | -69.6        | 0.06              | 3.5<br>(3.7)                            | -74.5        | 0.10          | 3.7<br>(4.4)                            | -73.2        | 0.13          | 4.4<br>(4.8)                            | -67.9        | 0.27          | 4.0<br>(1.0)                           | -70.8        | 0.64        |                                        |  |  |
| IgG <sup>d</sup>                | <b>10990247</b><br><b>(2970544)</b> | <b>9365024</b><br><b>(1279961)</b> | <b>-14.8</b> | <b>0.04</b>       | 9479464<br>(1373567)                    | -13.7        | 0.10          | 9687395<br>(1238729)                    | -11.9        | 0.24          | 9588709<br>(913856)                     | -12.8        | 0.20          | 9026261<br>(700340)                    | -17.9        | 0.13        |                                        |  |  |
| IgM <sup>d</sup>                | <b>1178848</b><br><b>(815850)</b>   | <b>677952</b><br><b>(243667)</b>   | <b>-42.5</b> | <b>0.0003</b>     | <b>701612</b><br><b>(236596)</b>        | <b>-40.5</b> | <b>0.0007</b> | <b>707570</b><br><b>(211093)</b>        | <b>-40.0</b> | <b>0.01</b>   | <b>663729</b><br><b>(219579)</b>        | <b>-43.7</b> | <b>0.03</b>   | 540437<br>(143023)                     | -54.2        | 0.07        |                                        |  |  |
| <b>Kidney function</b>          |                                     |                                    |              |                   |                                         |              |               |                                         |              |               |                                         |              |               |                                        |              |             |                                        |  |  |
| KIM-1 <sup>e</sup>              | <b>211.7</b><br><b>(159.5)</b>      | <b>316.7</b><br><b>(235.9)</b>     | <b>49.6</b>  | <b>0.03</b>       | 317.7<br>(253.1)                        | 50.1         | 0.09          | 243.7<br>(167.2)                        | 15.1         | 0.20          | 244.8<br>(188.6)                        | 15.6         | 0.44          | 189.3<br>(73.3)                        | -10.6        | 0.74        |                                        |  |  |

<sup>a</sup>cell/μl blood; <sup>b</sup>ng/ml plasma; <sup>c</sup>pg/ml serum; <sup>d</sup>μg/ml serum; <sup>e</sup>ng/l urine

**Notes:** For each endpoint, the same covariates as in our previous reports were included in each model; Covariates included in the linear models were age (as a continuous variable), sex, current smoking (yes/no), current alcohol consumption (yes/no), recent infections (flu or respiratory infections in the previous month) and body mass index (BMI).

**Supplementary Table 2. Spearman correlation matrix for selected biomarkers that showed significant differences between controls and those exposed to less than 10 ppm of TCE**

| <i>Controls</i>            |                            | <b>CD4+ effector<br/>memory T cells</b> | <b>sCD27</b> | <b>sCD30</b> | <b>IL-10</b> | <b>IgG</b> | <b>IgM</b> | <b>KIM-1</b> |
|----------------------------|----------------------------|-----------------------------------------|--------------|--------------|--------------|------------|------------|--------------|
|                            | CD4+ effect memory T cells | 1.00 <sup>a</sup>                       | 0.01         | 0.02         | -0.14        | -0.07      | 0.18       | 0.07         |
|                            | sCD27                      |                                         | 1.00         | 0.72         | 0.31         | -0.18      | -0.14      | -0.03        |
|                            | sCD30                      |                                         |              | 1.00         | 0.08         | -0.19      | -0.11      | -0.11        |
|                            | IL-10                      |                                         |              |              | 1.00         | 0.08       | 0.04       | -0.24        |
|                            | IgG                        |                                         |              |              |              | 1.00       | 0.16       | -0.19        |
|                            | IgM                        |                                         |              |              |              |            | 1.00       | -0.04        |
|                            | KIM-1                      |                                         |              |              |              |            |            | 1.00         |
|                            | WBC                        | 0.44                                    | 0.09         | 0.13         | 0.02         | -0.10      | 0.05       | 0.07         |
|                            | Lymphocytes                | 0.58                                    | -0.01        | 0.05         | -0.02        | 0.01       | 0.17       | -0.07        |
|                            | T cells                    | 0.52                                    | -0.01        | 0.05         | -0.07        | 0.01       | 0.09       | -0.10        |
|                            | CD4+ T cells               | 0.65                                    | 0.05         | 0.11         | -0.13        | -0.11      | 0.04       | -0.13        |
|                            | CD4+ naïve                 | 0.13                                    | 0.19         | 0.27         | -0.18        | -0.18      | -0.09      | -0.12        |
|                            | CD25Fox                    | 0.33                                    | -0.07        | -0.02        | -0.14        | 0.05       | -0.11      | -0.21        |
|                            | CD8+ T cells               | 0.34                                    | 0.02         | 0.03         | 0.04         | 0.06       | 0.12       | -0.15        |
|                            | CD8+ naïve                 | -0.01                                   | 0.05         | 0.23         | -0.08        | -0.06      | 0.14       | -0.24        |
|                            | CD8EM                      | 0.49                                    | 0.04         | 0.08         | -0.13        | 0.19       | 0.24       | -0.16        |
|                            | B cells                    | 0.35                                    | 0.21         | 0.21         | -0.16        | -0.30      | -0.03      | 0.25         |
|                            | NK cells                   | 0.29                                    | 0.02         | -0.01        | 0.11         | 0.02       | 0.30       | 0.00         |
|                            | PiGST                      | 0.24                                    | -0.05        | -0.16        | -0.22        | -0.17      | 0.16       | 0.66         |
| <i>Exposed<br/>workres</i> |                            | <b>CD4+ Effector<br/>Memory cells</b>   | <b>sCD27</b> | <b>sCD30</b> | <b>IL-10</b> | <b>IgG</b> | <b>IgM</b> | <b>KIM-1</b> |
|                            | CD4+ effect memory T cells | 1.00                                    | -0.03        | -0.26        | -0.13        | -0.17      | 0.16       | -0.04        |
|                            | sCD27                      |                                         | 1.00         | 0.29         | 0.04         | 0.15       | 0.10       | 0.12         |
|                            | sCD30                      |                                         |              | 1.00         | 0.28         | 0.07       | -0.15      | 0.10         |
|                            | IL-10                      |                                         |              |              | 1.00         | 0.32       | -0.14      | 0.03         |
|                            | IgG                        |                                         |              |              |              | 1.00       | -0.12      | -0.25        |
|                            | IgM                        |                                         |              |              |              |            | 1.00       | 0.15         |
|                            | KIM-1                      |                                         |              |              |              |            |            | 1.00         |
|                            | WBC                        | 0.38                                    | -0.04        | -0.08        | 0.11         | 0.09       | 0.04       | 0.01         |
|                            | Lymphocytes                | 0.69                                    | -0.09        | -0.21        | 0.07         | 0.04       | -0.04      | -0.12        |
|                            | T cells                    | 0.66                                    | -0.15        | -0.17        | -0.01        | -0.10      | -0.03      | -0.15        |

|                                         |              |                                   |              |              |              |            |            |              |       |
|-----------------------------------------|--------------|-----------------------------------|--------------|--------------|--------------|------------|------------|--------------|-------|
|                                         | CD4+ T cells | 0.73                              | -0.04        | -0.25        | -0.01        | 0.05       | -0.02      | -0.11        |       |
|                                         | CD4+ naïve   | 0.31                              | -0.10        | -0.16        | -0.01        | -0.04      | -0.04      | 0.03         |       |
|                                         | CD25Fox      | 0.33                              | 0.11         | -0.07        | 0.06         | 0.08       | -0.23      | -0.08        |       |
|                                         | CD8+ T cells | 0.44                              | -0.18        | -0.11        | 0.12         | -0.02      | -0.05      | -0.11        |       |
|                                         | CD8+ naïve   | 0.24                              | -0.12        | -0.11        | 0.13         | -0.04      | -0.03      | -0.18        |       |
|                                         | CD8EM        | 0.53                              | -0.19        | -0.05        | 0.15         | -0.07      | 0.06       | 0.05         |       |
|                                         | B cells      | 0.63                              | 0.15         | -0.09        | -0.10        | 0.00       | 0.10       | 0.02         |       |
|                                         | NK cells     | 0.27                              | 0.04         | -0.12        | 0.17         | 0.15       | -0.08      | -0.08        |       |
|                                         | PiGST        | 0.03                              | -0.05        | 0.11         | 0.14         | -0.08      | -0.02      | 0.44         |       |
| <i>Low exposed workers (&lt;10 ppm)</i> |              | <b>CD4+ Effector Memory cells</b> | <b>sCD27</b> | <b>sCD30</b> | <b>IL-10</b> | <b>IgG</b> | <b>IgM</b> | <b>KIM-1</b> |       |
|                                         |              | CD4+ effect memory T cells        | 1.00         | 0.06         | 0.03         | 0.02       | -0.15      | -0.00        | -0.22 |
|                                         |              | sCD27                             |              | 1.00         | 0.15         | 0.09       | 0.16       | 0.12         | 0.34  |
|                                         |              | sCD30                             |              |              | 1.00         | 0.10       | -0.02      | -0.38        | 0.32  |
|                                         |              | IL-10                             |              |              |              | 1.00       | -0.03      | 0.24         | 0.30  |
|                                         |              | IgG                               |              |              |              |            | 1.00       | -0.07        | -0.39 |
|                                         |              | IgM                               |              |              |              |            |            | 1.00         | 0.20  |
|                                         |              | KIM-1                             |              |              |              |            |            |              | 1.00  |
|                                         |              | WBC                               | 0.43         | 0.21         | 0.06         | 0.11       | 0.31       | 0.01         | -0.21 |
|                                         |              | Lymphocytes                       | 0.78         | 0.00         | 0.12         | 0.34       | 0.07       | 0.09         | -0.19 |
|                                         |              | T cells                           | 0.78         | -0.03        | 0.04         | 0.19       | -0.07      | 0.04         | -0.17 |
|                                         |              | CD4+ T cells                      | 0.76         | 0.17         | -0.02        | 0.14       | 0.06       | -0.07        | -0.16 |
|                                         |              | CD4+ naïve                        | 0.43         | 0.28         | 0.03         | 0.23       | -0.12      | 0.00         | 0.21  |
|                                         |              | CD25Fox                           | 0.17         | -0.13        | 0.03         | 0.04       | 0.04       | -0.30        | 0.02  |
|                                         |              | CD8+ T cells                      | 0.57         | -0.18        | 0.03         | 0.27       | -0.13      | 0.08         | -0.15 |
|                                         | CD8+ naïve   | 0.51                              | -0.15        | -0.10        | 0.10         | -0.20      | 0.10       | -0.15        |       |
|                                         | CD8EM        | 0.51                              | -0.18        | 0.11         | 0.44         | -0.20      | 0.12       | -0.05        |       |
|                                         | B cells      | 0.45                              | 0.26         | 0.12         | 0.21         | 0.18       | -0.07      | -0.00        |       |
|                                         | NK cells     | 0.46                              | 0.08         | 0.16         | 0.44         | 0.17       | 0.11       | -0.07        |       |
|                                         | PiGST        | 0.04                              | -0.04        | 0.05         | 0.02         | -0.26      | 0.17       | 0.21         |       |

<sup>a</sup> Spearman correlation coefficient; Note. Colors represents range of correlation coefficients: Blue ( $|r_{sp}| < 0.3$ ), Yellow ( $0.3 \leq |r_{sp}| < 0.5$ ), and Red ( $0.5 \leq |r_{sp}| \leq 1$ ).

**Supplementary Table 3. Levels of biological markers by TCE exposure level, stratified by work duration of the exposed workers**

| Variable                  | Unit                           | Controls(n=96)<br>Mean(SD) | TCE-exposed workers, Work Duration > 2 years |                      |                |                |                        |                                 | TCE-exposed workers, Work Duration <= 2 years |                        |                                 |         |                |       |         |         |
|---------------------------|--------------------------------|----------------------------|----------------------------------------------|----------------------|----------------|----------------|------------------------|---------------------------------|-----------------------------------------------|------------------------|---------------------------------|---------|----------------|-------|---------|---------|
|                           |                                |                            | <10ppm(n=15)                                 |                      | ≥10ppm(n=15)   |                | <10ppm(n=20)           |                                 | ≥10ppm(n=30)                                  |                        |                                 |         |                |       |         |         |
|                           |                                |                            | Mean(SD)                                     | % diff. <sup>a</sup> | P <sup>b</sup> | Mean(SD)       | % diff. P <sup>b</sup> | P <sub>trend</sub> <sup>f</sup> | Mean(SD)                                      | % diff. P <sup>b</sup> | P <sub>trend</sub> <sup>f</sup> |         |                |       |         |         |
| <b>Immune</b>             |                                |                            |                                              |                      |                |                |                        |                                 |                                               |                        |                                 |         |                |       |         |         |
| WBC <sup>c</sup>          | 10 <sup>3</sup> cells/μl blood | 6060.4(1348.3)             | 6102.0(1110.5)                               | 0.7                  | 6.2E-01        | 5295.3(1187.5) | -12.6                  | 9.1E-03                         | 3.3E-02                                       | 6434.0(1616.6)         | 6.2                             | 3.5E-01 | 5648.7(1268.3) | -6.8  | 1.8E-01 | 2.8E-01 |
| Granulocytes <sup>c</sup> | 10 <sup>3</sup> cells/μl blood | 3448.1(944.7)              | 3690.0(1079.5)                               | 7.0                  | 2.7E-01        | 3279.3(1093.9) | -4.9                   | 3.8E-01                         | 7.0E-01                                       | 3874.5(1167.0)         | 12.4                            | 9.2E-02 | 3481.0(971.1)  | 1.0   | 8.5E-01 | 6.3E-01 |
| Monocytes <sup>c</sup>    | 10 <sup>3</sup> cells/μl blood | 458.8(179.0)               | 436.7(141.0)                                 | -4.8                 | 9.8E-01        | 425.3(138.8)   | -7.3                   | 3.5E-01                         | 4.0E-01                                       | 459.5(181.8)           | 0.2                             | 6.0E-01 | 452.0(174.5)   | -1.5  | 9.3E-01 | 8.6E-01 |
| Lymphocytes <sup>c</sup>  | 10 <sup>3</sup> cells/μl blood | 2153.5(551.8)              | 1975.3(488.3)                                | -8.3                 | 2.9E-01        | 1590.7(417.2)  | -26.1                  | 9.3E-05                         | 1.1E-04                                       | 2100.0(600.3)          | -2.5                            | 9.2E-01 | 1715.7(452.2)  | -20.3 | 1.7E-04 | 3.8E-04 |
| T cells <sup>c</sup>      | 10 <sup>3</sup> cells/μl blood | 1346.2(376.2)              | 1324.5(380.3)                                | -1.6                 | 7.2E-01        | 1045.2(315.8)  | -22.4                  | 4.3E-03                         | 8.2E-03                                       | 1367.8(406.5)          | 1.6                             | 1.0E00  | 1168.9(357.2)  | -13.2 | 1.8E-02 | 2.7E-02 |
| CD4+ T cells <sup>c</sup> | 10 <sup>3</sup> cells/μl blood | 675.0(199.6)               | 657.5(218.3)                                 | -2.6                 | 6.1E-01        | 544.4(175.1)   | -19.3                  | 1.7E-02                         | 2.0E-02                                       | 698.6(231.8)           | 3.5                             | 8.0E-01 | 586.0(192.5)   | -13.2 | 2.7E-02 | 4.1E-02 |
| CD4+ naive <sup>c</sup>   | 10 <sup>3</sup> cells/μl blood | 283.2(125.5)               | 276.2(155.4)                                 | -2.5                 | 6.6E-01        | 231.2(99.2)    | -18.4                  | 3.7E-01                         | 3.3E-01                                       | 324.5(135.8)           | 14.6                            | 9.3E-01 | 232.1(117.5)   | -18.0 | 7.1E-03 | 1.0E-02 |
| CD4+ effector             | 10 <sup>3</sup> cells/μl blood | 224.9(92.9)                | 185.9(57.8)                                  | -17.3                | 9.2E-02        | 167.7(64.2)    | -25.4                  | 1.2E-03                         | 4.9E-04                                       | 178.8(57.4)            | -20.5                           | 1.9E-01 | 192.3(94.6)    | -14.5 | 5.5E-02 | 4.1E-02 |
| CD4CD25 <sup>c</sup>      | 10 <sup>3</sup> cells/μl blood | 68.6(35.2)                 | 74.9(31.7)                                   | 9.3                  | 3.4E-01        | 57.8(29.0)     | -15.7                  | 6.2E-02                         | 1.9E-01                                       | 83.3(36.1)             | 21.5                            | 7.9E-02 | 67.7(39.4)     | -1.3  | 5.1E-01 | 7.7E-01 |
| CD4CM <sup>c</sup>        | 10 <sup>3</sup> cells/μl blood | 168.6(70.6)                | 192.2(58.2)                                  | 14.0                 | 1.1E-01        | 150.2(44.0)    | -10.9                  | 2.4E-01                         | 6.2E-01                                       | 180.0(85.2)            | 6.7                             | 1.1E-01 | 176.7(70.2)    | 4.8   | 2.6E-01 | 1.8E-01 |
| CD4Fox <sup>c</sup>       | 10 <sup>3</sup> cells/μl blood | 51.7(20.8)                 | 45.1(29.8)                                   | -12.8                | 1.2E-01        | 45.9(22.3)     | -11.3                  | 8.6E-02                         | 3.7E-02                                       | 55.0(23.8)             | 6.3                             | 5.0E-01 | 50.0(27.8)     | -3.3  | 7.6E-01 | 8.7E-01 |
| CD25Fox <sup>c</sup>      | 10 <sup>3</sup> cells/μl blood | 53.1(21.3)                 | 46.2(27.4)                                   | -13.0                | 1.7E-01        | 44.2(19.5)     | -16.8                  | 2.0E-02                         | 1.0E-02                                       | 53.9(23.8)             | 1.4                             | 8.3E-01 | 51.3(29.1)     | -3.4  | 5.9E-01 | 6.4E-01 |
| CD8+ T cells <sup>c</sup> | 10 <sup>3</sup> cells/μl blood | 543.5(216.0)               | 538.6(184.3)                                 | -0.9                 | 9.2E-01        | 385.3(132.9)   | -29.1                  | 1.9E-03                         | 6.3E-03                                       | 518.9(169.8)           | -4.5                            | 8.1E-01 | 440.4(151.7)   | -19.0 | 1.4E-02 | 1.9E-02 |
| CD8+ naive <sup>c</sup>   | 10 <sup>3</sup> cells/μl blood | 209.9(103.6)               | 214.4(97.8)                                  | 2.2                  | 8.0E-01        | 121.6(68.7)    | -42.1                  | 7.4E-04                         | 1.9E-03                                       | 224.8(106.3)           | 7.1                             | 2.9E-01 | 163.6(97.6)    | -22.0 | 3.3E-04 | 3.3E-04 |
| CD8EM <sup>c</sup>        | 10 <sup>3</sup> cells/μl blood | 149.5(72.2)                | 170.5(89.6)                                  | 14.1                 | 3.8E-01        | 109.8(63.3)    | -26.6                  | 1.4E-02                         | 5.8E-02                                       | 130.7(46.5)            | -12.6                           | 7.5E-01 | 126.9(50.1)    | -15.1 | 3.5E-01 | 4.0E-01 |
| CD8CM <sup>c</sup>        | 10 <sup>3</sup> cells/μl blood | 8.5(7.5)                   | 8.5(2.9)                                     | 0.1                  | 2.4E-01        | 5.8(3.6)       | -32.2                  | 5.5E-02                         | 2.0E-01                                       | 7.4(6.8)               | -12.9                           | 5.1E-01 | 10.1(13.3)     | 18.1  | 3.3E-01 | 3.0E-01 |
| B cells <sup>c</sup>      | 10 <sup>3</sup> cells/μl blood | 220.9(132.0)               | 161.7(39.7)                                  | -26.8                | 2.2E-01        | 127.0(68.1)    | -42.5                  | 1.8E-04                         | 1.8E-04                                       | 224.5(127.6)           | 1.6                             | 8.2E-01 | 172.5(62.9)    | -21.9 | 2.3E-01 | 2.8E-01 |
| NK cells <sup>c</sup>     | 10 <sup>3</sup> cells/μl blood | 467.4(278.7)               | 362.7(152.8)                                 | -22.4                | 2.6E-01        | 319.6(159.3)   | -31.6                  | 2.7E-02                         | 1.8E-02                                       | 364.6(125.1)           | -22.0                           | 4.5E-01 | 282.3(159.7)   | -39.6 | 1.4E-04 | 1.9E-04 |
| sCD27 <sup>c</sup>        | ng/ml plasma                   | 148.8(107.5)               | 59.7(26.7)                                   | -59.9                | 7.9E-04        | 51.6(29.6)     | -65.3                  | 3.0E-05                         | 1.0E-06                                       | 52.3(16.9)             | -64.9                           | 2.0E-04 | 62.6(21.4)     | -57.9 | 9.0E-06 | 1.8E-06 |
| sCD30 <sup>c</sup>        | ng/ml plasma                   | 28.7(18.8)                 | 19.5(7.6)                                    | -32.1                | 1.2E-01        | 19.2(9.3)      | -33.0                  | 1.6E-02                         | 7.0E-03                                       | 18.1(7.9)              | -37.0                           | 2.3E-02 | 19.0(6.9)      | -33.9 | 3.5E-02 | 1.6E-02 |
| IL-10 <sup>d</sup>        | pg/ml serum                    | 13.8(23.0)                 | 2.1(1.2)                                     | -84.7                | 1.6E-02        | 4.4(6.2)       | -68.2                  | 9.4E-03                         | 2.3E-03                                       | 5.2(5.3)               | -62.7                           | 4.6E-01 | 5.0(4.5)       | -64.1 | 7.7E-02 | 7.0E-02 |
| IL-6 <sup>d</sup>         | pg/ml serum                    | 3.9(4.5)                   | 3.0(1.7)                                     | -24.8                | 5.9E-01        | 4.8(8.4)       | 22.3                   | 7.7E-01                         | 9.4E-01                                       | 5.1(3.0)               | 30.8                            | 3.9E-02 | 2.6(2.2)       | -34.7 | 3.7E-01 | 6.6E-01 |
| TNF-α <sup>d</sup>        | pg/ml serum                    | 5.4(2.8)                   | 5.2(1.6)                                     | -3.6                 | 3.9E-01        | 5.7(1.7)       | 4.9                    | 4.0E-01                         | 2.9E-01                                       | 6.0(2.3)               | 10.8                            | 2.2E-01 | 5.1(2.4)       | -4.9  | 9.0E-01 | 7.0E-01 |
| IgE <sup>e</sup>          | μg/ml serum                    | 128.8(138.5)               | 126.2(121.1)                                 | -2.0                 | 8.4E-01        | 99.8(83.1)     | -22.6                  | 6.4E-01                         | 6.3E-01                                       | 83.7(62.3)             | -35.0                           | 2.5E-01 | 132.5(156.8)   | 2.9   | 9.3E-01 | 8.2E-01 |
| IgG <sup>e</sup>          | μg/ml serum                    | 10990.2(2970.5)            | 9515.1(1891.6)                               | -13.4                | 1.7E-01        | 7876.0(2206.3) | -28.3                  | 1.9E-04                         | 2.1E-04                                       | 9025.0(1481.7)         | -17.9                           | 1.4E-02 | 9472.1(1950.9) | -13.8 | 1.8E-02 | 1.2E-02 |
| IgM <sup>e</sup>          | μg/ml serum                    | 1178.8(815.8)              | 836.2(456.7)                                 | -29.1                | 2.7E-02        | 722.8(302.1)   | -38.7                  | 8.8E-02                         | 3.4E-02                                       | 710.5(209.3)           | -39.7                           | 2.6E-03 | 706.4(397.7)   | -40.1 | 1.5E-04 | 9.4E-05 |
| <b>Kidney function</b>    |                                |                            |                                              |                      |                |                |                        |                                 |                                               |                        |                                 |         |                |       |         |         |
| KIM-1 <sup>e</sup>        | ng/l urine                     | 211.7(159.5)               | 332.8(300.8)                                 | 57.2                 | 1.4E-01        | 340.4(228.9)   | 60.8                   | 4.7E-04                         | 3.5E-04                                       | 315.3(210.9)           | 49.0                            | 2.7E-02 | 283.0(187.0)   | 33.7  | 1.1E-02 | 7.0E-03 |

|                       |            |              |             |       |         |              |       |         |         |              |      |         |              |      |         |         |
|-----------------------|------------|--------------|-------------|-------|---------|--------------|-------|---------|---------|--------------|------|---------|--------------|------|---------|---------|
| NAG <sup>e</sup>      | ng/l urine | 2.5(1.8)     | 2.3(1.1)    | -7.1  | 7.5E-01 | 1.8(1.3)     | -27.2 | 1.3E-01 | 2.0E-01 | 2.8(1.7)     | 15.5 | 5.9E-01 | 2.9(2.0)     | 17.6 | 3.8E-01 | 3.6E-01 |
| PiGST <sup>b</sup>    | ng/l urine | 26.5(20.1)   | 36.3(30.4)  | 36.9  | 3.0E-01 | 25.1(17.5)   | -5.1  | 2.7E-01 | 2.0E-01 | 30.7(17.4)   | 15.7 | 5.2E-01 | 31.9(29.3)   | 20.5 | 1.2E-01 | 1.2E-01 |
| VEGF <sup>c</sup>     | ng/l urine | 302.7(352.4) | 192.0(74.1) | -36.6 | 1.5E-01 | 210.2(114.7) | -30.5 | 1.8E-01 | 1.0E-01 | 273.0(190.4) | -9.8 | 5.8E-01 | 303.7(212.1) | 0.3  | 8.1E-01 | 8.8E-01 |
| AlphaGST <sup>d</sup> | ng/l urine | 8.1(6.4)     | 9.5(4.9)    | 16.9  | 4.1E-01 | 7.8(8.6)     | -3.5  | 9.8E-01 | 8.0E-01 | 7.6(4.9)     | -6.2 | 2.3E-01 | 8.4(8.9)     | 3.5  | 7.7E-01 | 6.7E-01 |

<sup>a</sup>% difference; <sup>b</sup>For each endpoint, the same covariates as in our previous reports were included in each model; Covariates included in the linear models were age (continuous), sex, current smoking (yes/no), current alcohol consumption (yes/no), recent infections (flu or respiratory infections in the previous month) and body mass index (kg/m<sup>2</sup>, BMI); <sup>c</sup> analyzed for 80 workers and 96 controls; <sup>d</sup> analyzed for 71 workers and 78 controls; <sup>e</sup> analyzed for 80 workers and 45 controls; <sup>f</sup> Trend was determined by using an ordinal variable for TCE exposure.

**Supplementary Table 4. Spearman correlation matrix for co-variates and biomarkers**

|         |                      | age   | sex   | current smoking | current alcohol use | infection | BMI   |
|---------|----------------------|-------|-------|-----------------|---------------------|-----------|-------|
| Overall | WBC                  | 0.01  | 0.05  | 0.14            | 0.03                | 0.12      | 0.21  |
|         | Granulocytes         | 0.00  | 0.04  | 0.12            | 0.03                | 0.10      | 0.19  |
|         | Monocytes            | -0.10 | 0.18  | 0.27            | -0.01               | 0.06      | 0.11  |
|         | Lymphocytes          | 0.05  | -0.01 | 0.09            | 0.03                | 0.07      | 0.13  |
|         | T cells              | -0.06 | -0.08 | -0.03           | 0.05                | 0.08      | 0.14  |
|         | CD4+ T cells         | 0.02  | -0.11 | -0.02           | 0.03                | 0.08      | 0.06  |
|         | CD4+ naïve           | -0.22 | 0.02  | 0.03            | 0.07                | 0.15      | -0.12 |
|         | CD4+ effector memory | 0.22  | -0.29 | -0.02           | 0.01                | 0.04      | 0.19  |
|         | CD4CD25              | 0.01  | 0.16  | 0.21            | -0.05               | 0.14      | -0.08 |
|         | CD4CM                | 0.23  | 0.05  | 0.07            | -0.06               | 0.13      | 0.20  |
|         | CD4Fox               | -0.01 | 0.21  | 0.18            | 0.14                | 0.04      | 0.03  |
|         | CD25Fox              | 0.00  | 0.24  | 0.19            | 0.12                | 0.06      | 0.02  |
|         | CD8+ T cells         | -0.04 | 0.08  | 0.05            | 0.05                | 0.05      | 0.13  |
|         | CD8+ naïve           | -0.35 | 0.06  | 0.16            | 0.01                | 0.06      | -0.20 |
|         | CD8EM                | 0.21  | -0.12 | -0.10           | -0.01               | 0.02      | 0.29  |
|         | CD8CM                | 0.26  | 0.06  | 0.04            | -0.13               | 0.04      | 0.20  |
|         | B cells              | -0.02 | 0.02  | 0.12            | 0.03                | 0.15      | -0.01 |
|         | NK cells             | 0.13  | 0.01  | 0.07            | 0.00                | 0.02      | 0.05  |
|         | sCD27                | 0.18  | 0.14  | 0.04            | 0.04                | 0.16      | 0.01  |
|         | sCD30                | 0.06  | 0.17  | 0.00            | 0.03                | 0.16      | -0.06 |
|         | IL-10                | 0.14  | 0.16  | -0.04           | -0.02               | 0.07      | -0.02 |
|         | IL-6                 | -0.05 | 0.01  | 0.02            | -0.02               | 0.04      | -0.04 |
|         | TNF-a                | -0.08 | 0.34  | 0.24            | -0.01               | 0.03      | -0.05 |
|         | IgE                  | -0.11 | -0.24 | -0.18           | 0.02                | 0.10      | -0.07 |
|         | IgG                  | 0.00  | 0.13  | -0.06           | -0.05               | -0.06     | 0.10  |
|         | IgM                  | 0.05  | -0.44 | -0.19           | 0.04                | 0.11      | -0.12 |
|         | KIM-1                | 0.05  | 0.02  | 0.01            | 0.09                | -0.03     | 0.17  |
|         | NAG                  | -0.06 | 0.15  | 0.04            | 0.16                | -0.04     | 0.22  |
|         | PiGST                | 0.01  | -0.15 | -0.08           | -0.03               | -0.03     | 0.21  |
|         | VEGF                 | -0.22 | 0.54  | 0.35            | 0.09                | -0.19     | -0.02 |

|          | AlphaGST             | -0.09 | -0.28 | -0.21 | -0.14 | -0.11 | 0.01  |
|----------|----------------------|-------|-------|-------|-------|-------|-------|
| Controls | WBC                  | 0.02  | 0.13  | 0.30  | 0.06  | 0.19  | 0.25  |
|          | Granulocytes         | 0.00  | 0.10  | 0.26  | 0.07  | 0.21  | 0.26  |
|          | Monocytes            | -0.11 | 0.19  | 0.38  | 0.03  | 0.09  | 0.06  |
|          | Lymphocytes          | 0.13  | 0.09  | 0.22  | 0.02  | 0.09  | 0.19  |
|          | T cells              | -0.04 | 0.00  | -0.01 | 0.08  | 0.12  | 0.22  |
|          | CD4+ T cells         | 0.05  | -0.02 | 0.02  | 0.13  | 0.10  | 0.03  |
|          | CD4+ naïve           | -0.20 | 0.20  | 0.06  | 0.13  | 0.17  | -0.15 |
|          | CD4+ effector memory | 0.24  | -0.29 | 0.10  | 0.06  | -0.02 | 0.24  |
|          | CD4CD25              | 0.12  | 0.23  | 0.31  | -0.02 | 0.24  | -0.05 |
|          | CD4CM                | 0.35  | 0.17  | 0.11  | -0.04 | 0.19  | 0.24  |
|          | CD4Fox               | 0.03  | 0.21  | 0.18  | 0.17  | 0.10  | 0.02  |
|          | CD25Fox              | 0.04  | 0.25  | 0.20  | 0.16  | 0.14  | 0.01  |
|          | CD8+ T cells         | -0.03 | 0.17  | 0.07  | 0.06  | 0.06  | 0.25  |
|          | CD8+ naïve           | -0.39 | 0.21  | 0.34  | 0.07  | -0.02 | -0.18 |
|          | CD8EM                | 0.15  | -0.08 | -0.02 | -0.03 | -0.03 | 0.35  |
|          | CD8CM                | 0.31  | 0.14  | 0.13  | -0.18 | 0.11  | 0.24  |
|          | B cells              | 0.05  | 0.13  | 0.30  | 0.13  | 0.16  | -0.03 |
|          | NK cells             | 0.20  | -0.07 | 0.10  | -0.09 | 0.00  | 0.10  |
|          | sCD27                | 0.19  | 0.29  | 0.14  | 0.09  | 0.22  | -0.03 |
|          | sCD30                | 0.05  | 0.24  | 0.12  | 0.00  | 0.26  | -0.13 |
|          | IL-10                | 0.23  | 0.20  | -0.04 | -0.10 | 0.05  | -0.02 |
|          | IL-6                 | 0.07  | 0.05  | 0.02  | 0.02  | 0.02  | -0.12 |
|          | TNF-a                | 0.08  | 0.31  | 0.21  | 0.01  | 0.05  | 0.00  |
|          | IgE                  | -0.21 | -0.36 | -0.31 | 0.01  | 0.10  | -0.16 |
|          | IgG                  | 0.06  | 0.24  | 0.00  | 0.17  | -0.36 | 0.23  |
|          | IgM                  | -0.06 | -0.43 | -0.23 | -0.13 | -0.14 | -0.18 |
|          | KIM-1                | -0.08 | -0.12 | 0.00  | 0.01  | -0.01 | 0.33  |
|          | NAG                  | -0.21 | 0.09  | -0.03 | 0.00  | -0.22 | 0.17  |
|          | PiGST                | -0.08 | -0.30 | -0.02 | -0.02 | -0.05 | 0.29  |
|          | VEGF                 | -0.22 | 0.48  | 0.33  | 0.06  | -0.21 | 0.06  |
|          | AlphaGST             | -0.07 | -0.29 | -0.08 | -0.18 | -0.02 | -0.01 |



|                 |                      |       |       |       |       |       |       |
|-----------------|----------------------|-------|-------|-------|-------|-------|-------|
| Exposed workers | WBC                  | -0.01 | -0.06 | -0.05 | -0.02 | 0.02  | 0.15  |
|                 | Granulocytes         | 0.03  | -0.02 | -0.04 | 0.00  | -0.04 | 0.12  |
|                 | Monocytes            | -0.08 | 0.17  | 0.12  | -0.08 | 0.02  | 0.16  |
|                 | Lymphocytes          | -0.11 | -0.11 | -0.01 | -0.02 | 0.05  | 0.04  |
|                 | T cells              | -0.15 | -0.21 | -0.04 | -0.03 | 0.03  | 0.00  |
|                 | CD4+ T cells         | -0.07 | -0.21 | -0.03 | -0.08 | 0.06  | 0.06  |
|                 | CD4+ naïve           | -0.28 | -0.17 | 0.02  | -0.03 | 0.13  | -0.12 |
|                 | CD4+ effector memory | 0.14  | -0.31 | -0.10 | -0.08 | 0.07  | 0.12  |
|                 | CD4CD25              | -0.06 | 0.10  | 0.09  | -0.07 | 0.03  | -0.12 |
|                 | CD4CM                | 0.13  | -0.09 | 0.02  | -0.10 | 0.09  | 0.14  |
|                 | CD4Fox               | -0.07 | 0.21  | 0.19  | 0.09  | -0.02 | 0.03  |
|                 | CD25Fox              | -0.07 | 0.23  | 0.18  | 0.07  | -0.01 | 0.02  |
|                 | CD8+ T cells         | -0.10 | -0.05 | 0.04  | -0.01 | 0.03  | -0.03 |
|                 | CD8+ naïve           | -0.39 | -0.13 | 0.01  | -0.10 | 0.13  | -0.28 |
|                 | CD8EM                | 0.27  | -0.16 | -0.17 | 0.01  | 0.07  | 0.19  |
|                 | CD8CM                | 0.15  | -0.03 | -0.05 | -0.04 | -0.06 | 0.15  |
|                 | B cells              | -0.15 | -0.16 | -0.14 | -0.18 | 0.12  | -0.01 |
|                 | NK cells             | -0.04 | 0.07  | 0.07  | 0.03  | 0.05  | -0.03 |
|                 | sCD27                | -0.04 | -0.11 | -0.10 | -0.17 | 0.06  | 0.03  |
|                 | sCD30                | -0.01 | 0.03  | -0.15 | -0.02 | -0.05 | -0.01 |
|                 | IL-10                | 0.03  | 0.27  | 0.10  | 0.07  | 0.00  | -0.02 |
|                 | IL-6                 | -0.17 | -0.05 | 0.00  | -0.07 | 0.06  | 0.05  |
|                 | TNF-a                | -0.25 | 0.40  | 0.28  | -0.03 | 0.03  | -0.10 |
|                 | IgE                  | -0.06 | -0.15 | -0.10 | 0.02  | 0.11  | -0.01 |
|                 | IgG                  | -0.05 | 0.14  | -0.01 | -0.24 | 0.10  | 0.06  |
|                 | IgM                  | 0.12  | -0.48 | -0.16 | 0.10  | 0.24  | -0.04 |
|                 | KIM-1                | 0.10  | 0.07  | -0.04 | 0.19  | -0.06 | 0.07  |
|                 | NAG                  | 0.03  | 0.18  | 0.07  | 0.27  | 0.03  | 0.27  |
|                 | PiGST                | 0.06  | -0.07 | -0.13 | -0.03 | -0.04 | 0.18  |
|                 | VEGF                 | -0.26 | 0.57  | 0.34  | 0.12  | -0.22 | -0.09 |
|                 | AlphaGST             | -0.09 | -0.30 | -0.27 | -0.11 | -0.17 | 0.01  |

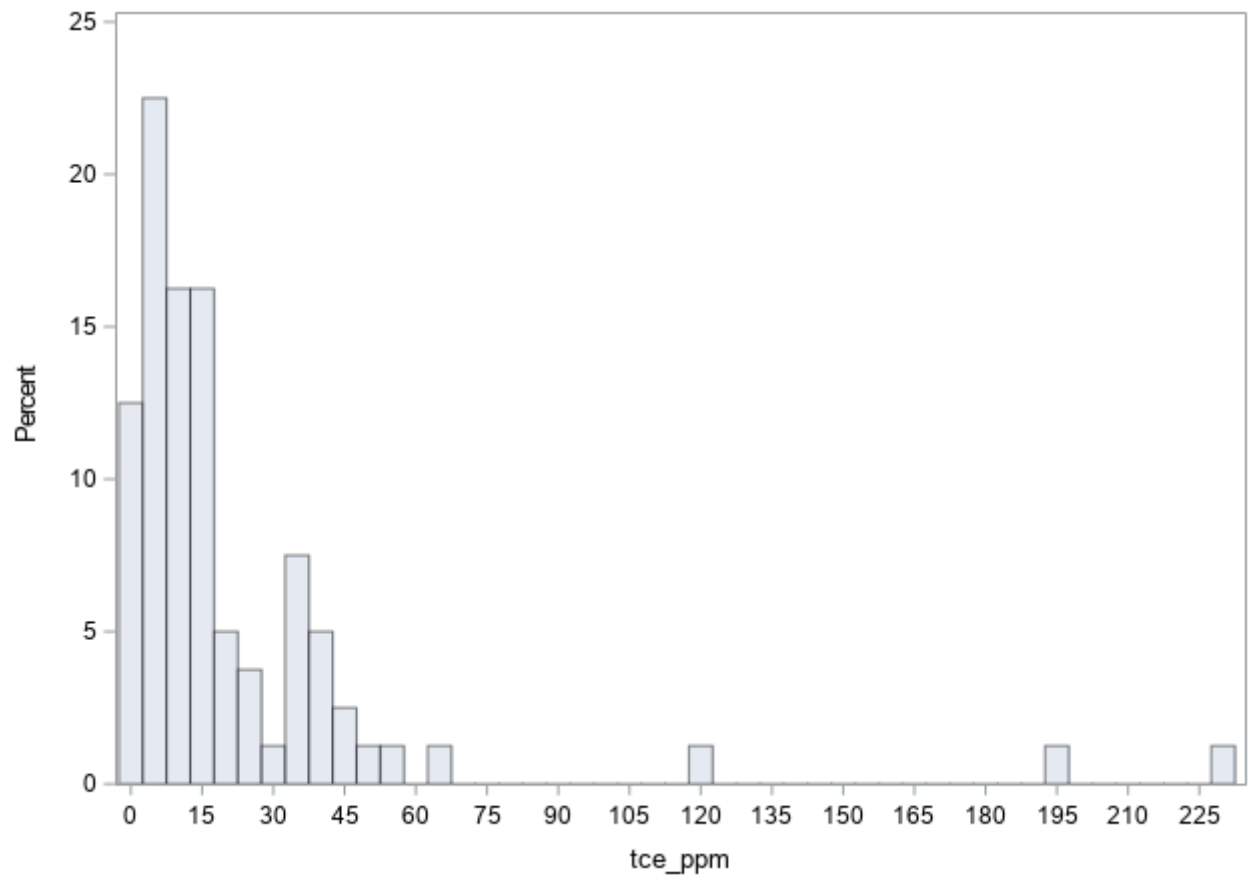

**Supplementary Figure 1. Distribution of level of TCE exposure among exposed workers.**

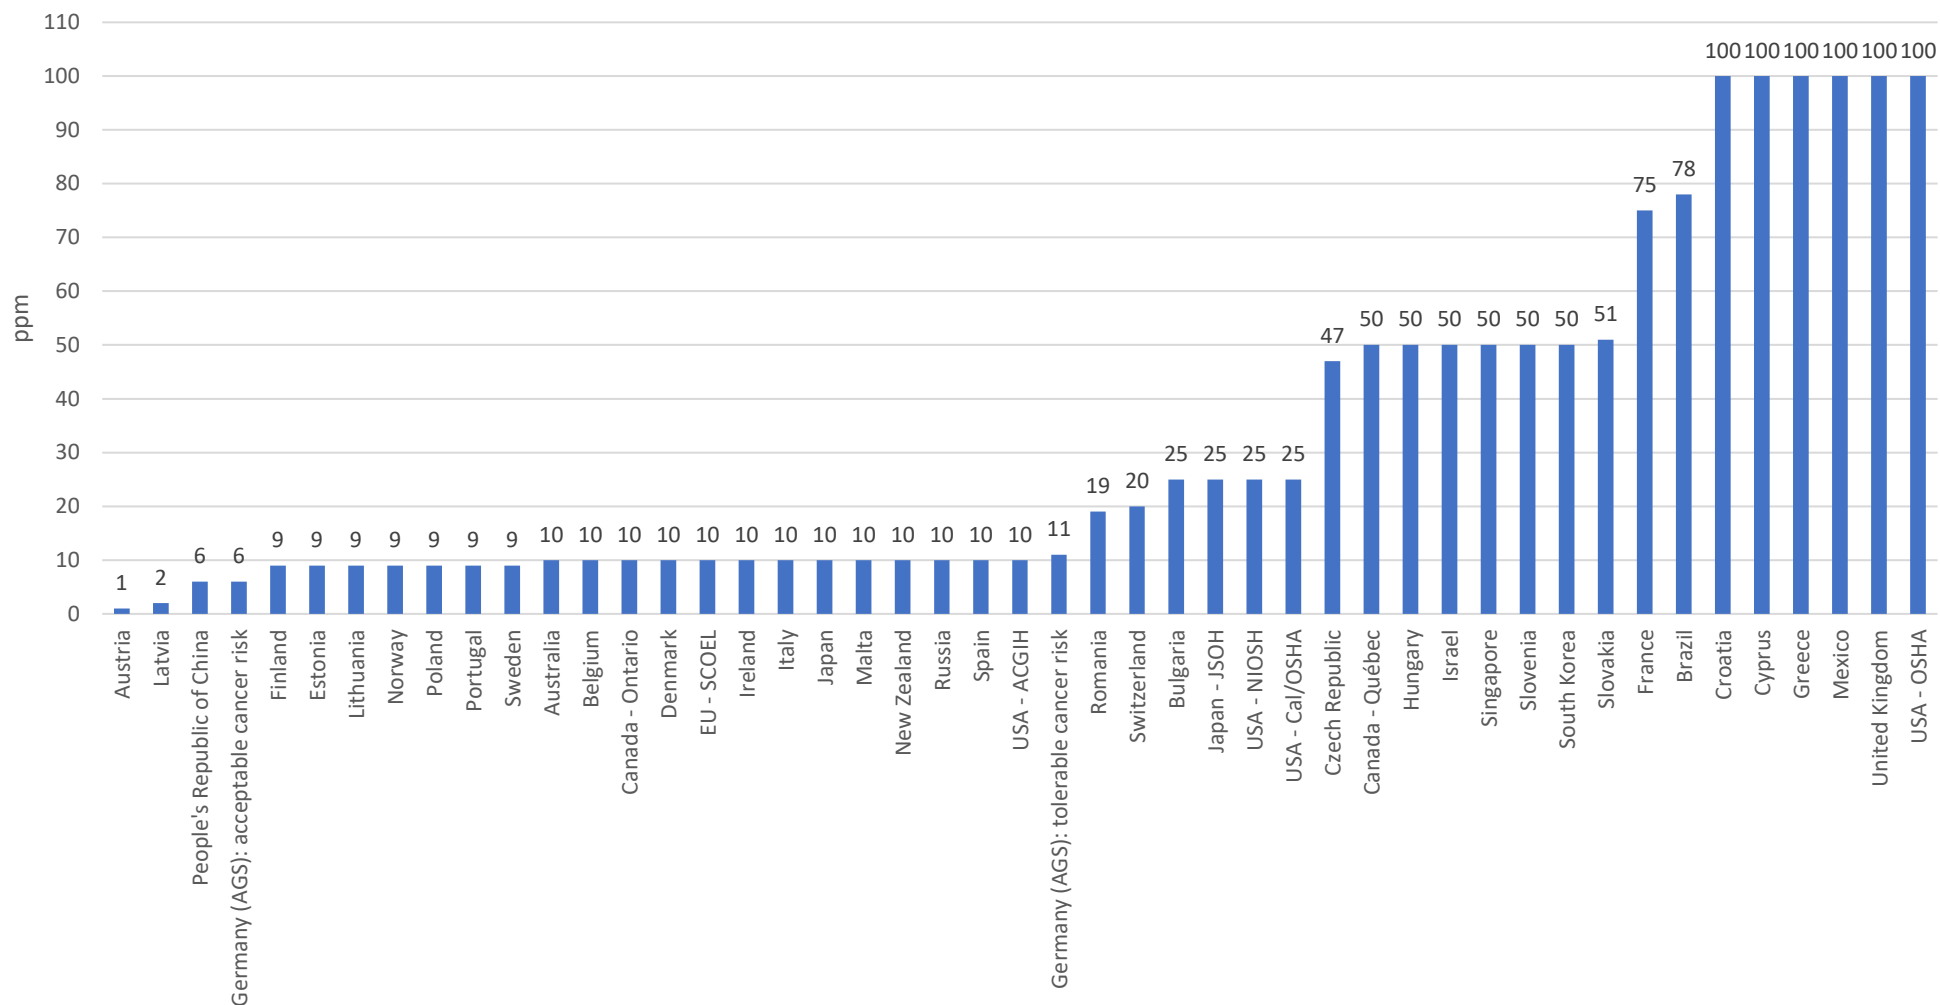

**Supplementary Figure 2. International comparison of recommended or regulatory limits for occupational exposure to trichloroethylene: time weighted average for 8 hours (unit: ppm).** While many countries or organizations still set relatively high level as a standard (i.e.,  $\geq 25$  ppm), many countries or organizations including USA – ACGIH and EU – SCOEL suggest or adopt 10 ppm as a standard. Note. The  $\mu\text{g}/\text{m}^3$  unit was converted to ppm unit.

**Abbreviations:** AGS - Committee on Hazardous Substances (Ausschuss für Gefahrstoffe), SCOEL - Scientific Committee on Occupational Exposure Limits, NIOSH - National Institute of Occupational Safety and Health, Cal/NIOSH – California NIOSH, OSHA - Occupational Safety and Health Administration
